# Supplementary material for: Biomass@MOF nanohybrid materials for competitive drug adsorption: analysis by conventional macroscopic models and statistical physical models
Source: Royal Society of Chemistry journal article supplement (doi:10.1039/d3en00843f), 2024-01-01
Supplement: d3en00843f1.pdf [file d3en00843f1.pdf]

**Biomass@MOF nanohybrid materials for competitive drug adsorption: analysis by conventional macroscopic models and statistical physical models**

Bryan Fernando Rivadeneira-Mendoza<sup>1,2</sup>, Luis Santiago Quiroz-Fernández<sup>1</sup>, Fausthon Freda Silva<sup>3</sup>, Rafael Luque<sup>4,5\*</sup>, Alina M. Balu<sup>2</sup>, Joan Manuel Rodríguez-Díaz<sup>1,6\*</sup>

<sup>1</sup> Laboratorio de Análisis Químicos y Biotecnológicos, Instituto de Investigación, Universidad Técnica de Manabí, S/N, Avenida Urbina y Che Guevara, Portoviejo 130104, Ecuador.

<sup>2</sup> Departamento de Química Orgánica, Universidad de Córdoba, Edificio Marie Curie (C-3), Campus de Rabanales, Ctra. Nnal. IV-A, Km 396, E14014, Córdoba, Spain.

<sup>3</sup> Departamento de Química, Universidade Federal da Paraíba (UFPB), 58.051-900 João Pessoa, PB, Brazil.

<sup>4</sup> Universidad ECOTEC, Km. 13.5 Samborondón, Samborondón, EC092302, Ecuador, E-mail: [rluque@ecotec.edu.ec](mailto:rluque@ecotec.edu.ec)

<sup>5</sup> National University of Science and Technology Polytechnica Bucharest, 1-7 Gh. Polizu str., Bucharest, Romania, E-mail: [rafael.alvarez@upb.ro](mailto:rafael.alvarez@upb.ro)

<sup>6</sup> Departamento de Procesos Químicos, Facultad de Ciencias Matemáticas, Físicas y Químicas, Universidad Técnica de Manabí, Portoviejo, Ecuador. E-mail: [joan.rodriguez@utm.edu.ec](mailto:joan.rodriguez@utm.edu.ec)

**Table S1.** Combinations of initial concentrations of KTC and NPX for a competing system

| $C_{0KTC}$ | $C_{0NPX}$ | $C_{0KTC}$ | $C_{0NPX}$ |
|------------|------------|------------|------------|
| 0.1        | 0          | 0.1        | 0.1        |
| 0.3        | 0          | 0.3        | 0.1        |
| 0.5        | 0          | 0.5        | 0.1        |
| 0.7        | 0          | 0.7        | 0.1        |
| 0.9        | 0          | 0.9        | 0.1        |
| 0.1        | 0.3        | 0.1        | 0.5        |
| 0.3        | 0.3        | 0.3        | 0.5        |
| 0.5        | 0.3        | 0.5        | 0.5        |
| 0.7        | 0.3        | 0.7        | 0.5        |
| 0.9        | 0.3        | 0.9        | 0.5        |
| 0.1        | 0.7        | 0.1        | 0.9        |
| 0.3        | 0.7        | 0.3        | 0.9        |
| 0.5        | 0.7        | 0.5        | 0.9        |
| 0.7        | 0.7        | 0.7        | 0.9        |
| 0.9        | 0.7        | 0.9        | 0.9        |

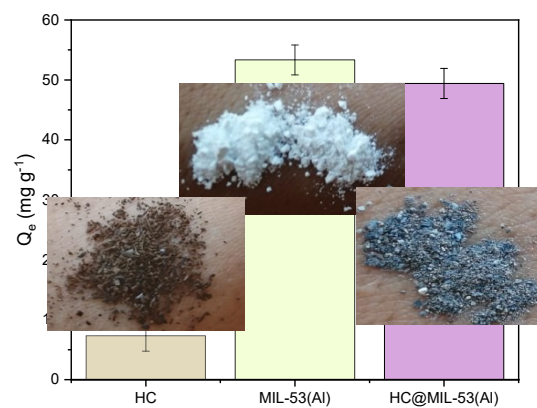

**Fig. S1.** Comparison of the adsorption capacity ( $Q_e$ ) of the pristine materials and the new composite separately

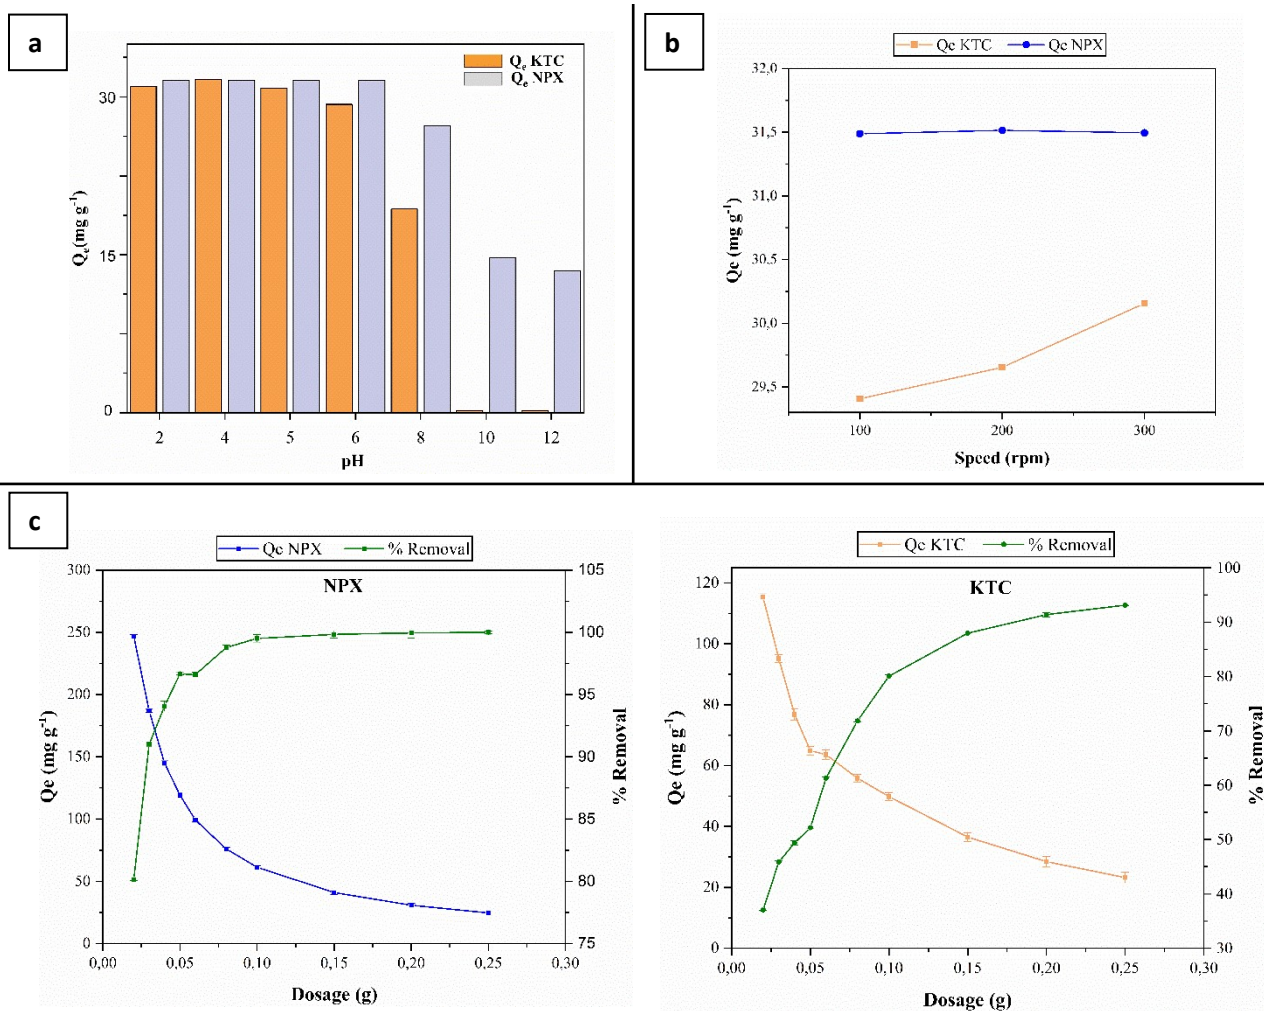

**Fig. S2.** Main parameters of the ADS: pH study (a), agitation speed study (b) and dosage study (c).

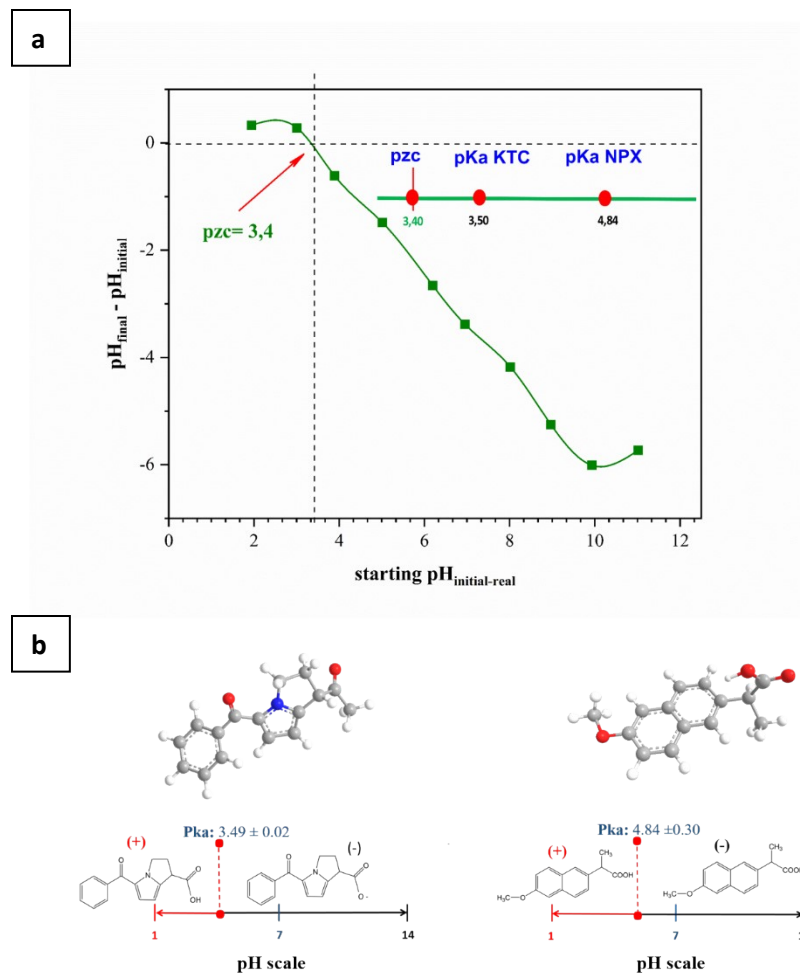

**Fig. S.3.** Point zero charge (PZC) of HC@MIL-53(Al) obtained by a graphical method **(a)** and related information to the PKa of KTC and NPX as a function of medium pH **(b)**.

**Table S2.** Kinetic fitting parameters and well-fitting models for the adsorption of KTC on HC@MIL-53(Al)

| Parámetros                                              | C <sub>0</sub> KTC (mg L <sup>-1</sup> ) |        |        |        |        |        |        |
|---------------------------------------------------------|------------------------------------------|--------|--------|--------|--------|--------|--------|
|                                                         | 25.53                                    | 75.58  | 127.63 | 178.69 | 229.40 | 280.79 | 331.85 |
| Q <sub>e</sub> , exp (mg g <sup>-1</sup> )              | 6.623                                    | 19.074 | 29.875 | 42.429 | 52.046 | 64.406 | 74.928 |
| <b>Pseudo primer orden (PFO)</b>                        |                                          |        |        |        |        |        |        |
| Q <sub>e</sub> , cal (mg g <sup>-1</sup> )              | 6.573                                    | 18.631 | 29.056 | 41.178 | 49.917 | 50.871 | 72.445 |
| k <sub>1</sub> (min <sup>-1</sup> )                     | 3.284                                    | 3.284  | 0.382  | 1.358  | 25.29  | 39.38  | 0.217  |
| R <sup>2</sup>                                          | 0.649                                    | 0.649  | 0.910  | 0.981  | 0.953  | 0.745  | 0.979  |
| MPSD                                                    | 1.564                                    | 2.717  | 14.25  | 4.260  | 40.261 | 60.372 | 16.685 |
| <b>Pseudo segundo orden (PSO)</b>                       |                                          |        |        |        |        |        |        |
| Q <sub>e</sub> , cal (mg g <sup>-1</sup> )              | 3.081                                    | 6.620  | 30.292 | 41.17  | 52.306 | 66.903 | 77.131 |
| k <sub>2</sub> (mg g <sup>-1</sup> min <sup>-1</sup> )  | 2.726                                    | 0.224  | 0.023  | 0.028  | 0.026  | 0.005  | 0.004  |
| R <sup>2</sup>                                          | 0.969                                    | 0.961  | 0.966  | 0.990  | 0.993  | 0.991  | 0.986  |
| MPSD                                                    | 1.051                                    | 1.097  | 8.634  | 2.863  | 5.694  | 8.071  | 10.113 |
| <b>Avrami Fractionary</b>                               |                                          |        |        |        |        |        |        |
| Q <sub>e</sub> , cal (mg g <sup>-1</sup> )              | 2.692                                    | 18.631 | 26.045 | 41.779 | 47.201 | 63.73  | 58.745 |
| k (min <sup>-1</sup> )                                  | 0.001                                    | 1.310  | 14.117 | 0.371  | 28.817 | 0.126  | 25.889 |
| n                                                       | 0.018                                    | 1.311  | 0.617  | 0.528  | 2.961  | 0.571  | 1.390  |
| R <sup>2</sup>                                          | 0.760                                    | 0.896  | 0.789  | 0.996  | 0.799  | 0.993  | 0.646  |
| MPSD                                                    | 4.320                                    | 13.67  | 11.400 | 1.409  | 23.55  | 5.780  | 57.189 |
| <b>Bangham</b>                                          |                                          |        |        |        |        |        |        |
| k <sub>y</sub> (min <sup>-1</sup> )                     | 0.013                                    | 0.022  | 0.028  | 0.008  | 0.008  | 0.004  | 0.004  |
| α (mg g <sup>-1</sup> min <sup>-1</sup> )               | 0.011                                    | 0.013  | 0.018  | 0.005  | 0.104  | 0.228  | 0.109  |
| R <sup>2</sup>                                          | 0.897                                    | 0.983  | 0.895  | 0.761  | 0.845  | 0.637  | 0.701  |
| MPSD                                                    | 0.377                                    | 3.617  | 13.488 | 13.483 | 10.446 | 16.833 | 14.056 |
| <b>Difusión intrapartícula</b>                          |                                          |        |        |        |        |        |        |
| <b>Región 1</b>                                         |                                          |        |        |        |        |        |        |
| K <sub>id</sub> (mg g <sup>-1</sup> min <sup>-1</sup> ) | 0.036                                    | 0.664  | 4.022  | 4.022  | 4.402  | 5.123  | 4.485  |
| C <sub>intersept</sub>                                  | 5.25                                     | 8.67   | 13.87  | 7.24   | 9.74   | 10.05  | 15.24  |
| MPSD                                                    | 1.693                                    | 12.58  | 34.448 | 34.448 | 30.305 | 40.379 | 32.593 |
| <b>Región 2</b>                                         |                                          |        |        |        |        |        |        |
| K <sub>id</sub> (mg g <sup>-1</sup> min <sup>-1</sup> ) | 0.009                                    | 0.020  | 0.097  | 0.097  | 0.165  | 0.644  | 0.956  |
| C <sub>intersept</sub>                                  | 10.01                                    | 14.95  | 31.92  | 25.79  | 37.95  | 16.76  | 10.22  |
| MPSD                                                    | 2.375                                    | 8.288  | 4.378  | 4.374  | 5.901  | 20.389 | 25.264 |
| <b>Región 3</b>                                         |                                          |        |        |        |        |        |        |
| K <sub>id</sub> (mg g <sup>-1</sup> min <sup>-1</sup> ) | 0.001                                    | 0.03   | 0.015  | 0.015  | 0.023  | 0.042  | 0.066  |
| C <sub>intersept</sub>                                  | 12.92                                    | 16.66  | 20.75  | 29.73  | 40.59  | 21.23  | 14.47  |
| MPSD                                                    | 0.671                                    | 2.441  | 3.688  | 3.688  | 2.321  | 6.886  | 9.181  |

**Table S3.** Kinetic fitting parameters and well-fitting models for the adsorption of NPX on HC@MIL-53(Al)

|                                                         | <b>C<sub>0</sub> NPX (mg L<sup>-1</sup>)</b> |              |               |               |               |               |               |
|---------------------------------------------------------|----------------------------------------------|--------------|---------------|---------------|---------------|---------------|---------------|
| <b>Parámetros</b>                                       | <b>25.22</b>                                 | <b>75.67</b> | <b>126.12</b> | <b>176.58</b> | <b>227.03</b> | <b>277.48</b> | <b>327.93</b> |
| Q <sub>e</sub> , exp (mg g <sup>-1</sup> )              | 6.135                                        | 18.000       | 31.199        | 43.235        | 55.089        | 67.784        | 80.923        |
| <b>Pseudo primer orden (PFO)</b>                        |                                              |              |               |               |               |               |               |
| Q <sub>e</sub> , cal (mg g <sup>-1</sup> )              | 6.135                                        | 17.991       | 30.790        | 43.132        | 54.925        | 65.376        | 78.418        |
| k <sub>1</sub> (min <sup>-1</sup> )                     | 3.284                                        | 1.716        | 0.381         | 0.686         | 0.805         | 39.382        | 0.217         |
| R <sup>2</sup>                                          | 0.999                                        | 0.981        | 0.856         | 0.974         | 0.968         | 0.669         | 0.696         |
| MPSD                                                    | 0.001                                        | 0.086        | 3.240         | 0.417         | 0.386         | 6.541         | 4.991         |
| <b>Pseudo segundo orden (PSO)</b>                       |                                              |              |               |               |               |               |               |
| Q <sub>e</sub> , cal (mg g <sup>-1</sup> )              | 6.141                                        | 18.010       | 31.362        | 43.371        | 55.179        | 67.364        | 80.312        |
| k <sub>2</sub> (mg g <sup>-1</sup> min <sup>-1</sup> )  | 4.711                                        | 2.727        | 2.023         | 1.156         | 1.024         | 0.005         | 0.004         |
| R <sup>2</sup>                                          | 0.941                                        | 0.983        | 0.965         | 0.989         | 0.992         | 0.894         | 0.910         |
| MPSD                                                    | 0.115                                        | 0.174        | 1.619         | 0.270         | 0.190         | 1.056         | 2.947         |
| <b>Avrami Fractionary</b>                               |                                              |              |               |               |               |               |               |
| Q <sub>e</sub> , cal (mg g <sup>-1</sup> )              | 6.135                                        | 17.996       | 31.227        | 35.025        | 55.021        | 68.016        | 77.302        |
| k (min <sup>-1</sup> )                                  | 6.286                                        | 0.743        | 0.271         | 0.001         | 0.560         | 0.102         | 28.116        |
| n                                                       | 5.196                                        | 0.019        | 0.132         | 0.027         | 0.055         | 0.102         | 42.031        |
| R <sup>2</sup>                                          | 0.999                                        | 0.974        | 0.9807        | 0.752         | 0.993         | 0.962         | 0.659         |
| MPSD                                                    | 0.001                                        | 0.0518       | 1.281         | 6.797         | 0.185         | 2.552         | 7.583         |
| <b>Bangham</b>                                          |                                              |              |               |               |               |               |               |
| k <sub>y</sub> (min <sup>-1</sup> )                     | 0.012                                        | 0.012        | 0.011         | 0.012         | 0.012         | 0.011         | 0.011         |
| α (mg g <sup>-1</sup> min <sup>-1</sup> )               | 0.013                                        | 0.001        | 0.028         | 0.008         | 0.021         | 0.046         | 0.037         |
| R <sup>2</sup>                                          | 0.597                                        | 0.887        | 0.948         | 0.812         | 0.804         | 0.878         | 0.896         |
| MPSD                                                    | 0.376                                        | 0.284        | 3.875         | 1.284         | 1.011         | 3.925         | 181.826       |
| <b>Difusión intrapartícula</b>                          |                                              |              |               |               |               |               |               |
| <b>Región 1</b>                                         |                                              |              |               |               |               |               |               |
| K <sub>id</sub> (mg g <sup>-1</sup> min <sup>-1</sup> ) | 0.015                                        | 0.050        | 1.139         | 0.549         | 0.576         | 1.281         | 1.485         |
| C <sub>intersept</sub>                                  | 10.57                                        | 16.04        | 17.61         | 22.99         | 39.14         | 44.36         | 40.21         |
| MPSD                                                    | 0.817                                        | 0.949        | 11.512        | 4.135         | 3.449         | 6.586         | 6.170         |
| <b>Región 2</b>                                         |                                              |              |               |               |               |               |               |
| K <sub>id</sub> (mg g <sup>-1</sup> min <sup>-1</sup> ) | 0.001                                        | 0.001        | 0.017         | 0.008         | 0.012         | 0.159         | 0.166         |
| C <sub>intersept</sub>                                  | 12.97                                        | 13.99        | 18.22         | 30.88         | 42.94         | 46.31         | 61.33         |
| MPSD                                                    | 0.001                                        | 0.660        | 1.035         | 15.622        | 0.391         | 4.446         | 4.032         |
| <b>Región 3</b>                                         |                                              |              |               |               |               |               |               |
| K <sub>id</sub> (mg g <sup>-1</sup> min <sup>-1</sup> ) | 0.002                                        | 0.001        | 0.003         | 0.001         | 0.002         | 0.001         | 0.005         |
| C <sub>intersept</sub>                                  | 11.36                                        | 15.49        | 24.67         | 31.50         | 43.11         | 47.29         | 63.66         |
| MPSD                                                    | 0.001                                        | 0.001        | 1.836         | 0.312         | 0.183         | 0.059         | 0.700         |

**Table S4.** Fitting parameters of bicomponent equilibrium isotherms for KTC adsorption and effect of temperature.

| Isoterma                    | Parámetros        | Temperatura (K) |             |             |
|-----------------------------|-------------------|-----------------|-------------|-------------|
|                             |                   | 298             | 313         | 328         |
| <b>Langmuir Extendida</b>   | $q_{\max}$        | 50.1863         | 55.1507     | 54.2470     |
|                             | $b_{\text{KTC}}$  | 0.4198          | 0.4049      | 0.5084      |
|                             | $b_{\text{NPX}}$  | 0.0010          | 0.0000      | 0.0000      |
|                             | MPSD              | 27.9083         | 61.8969     | 31.1766     |
|                             | $R^2$             | 0.9093          | 0.9412      | 0.9573      |
| <b>Freundlich Extendida</b> | $K_{\text{FKTC}}$ | 14.4914         | 16.9450     | 19.1311     |
|                             | $n_{\text{KTC}}$  | 1.3768          | 2.8417      | 3.3008      |
|                             | $X_{\text{KTC}}$  | 0.3796          | 7.6751      | 0.000       |
|                             | $Y_{\text{KTC}}$  | 3.2227          | 2.0664      | 0.0022      |
|                             | $Z_{\text{KTC}}$  | 0.5888          | 0.5306      | 1.9131      |
|                             | MPSD              | 6.5711          | 3.4963      | 0.1992      |
|                             | $R^2$             | 0.9875          | 0.9950      | 0.9987      |
| <b>Sips Extendida</b>       | $q_{\text{mKTC}}$ | 139.3417        | 5674.5346   | 1213.4858   |
|                             | $b_{\text{KTC}}$  | 0.1194          | 0.0031      | 0.0162      |
|                             | $n_{\text{KTC}}$  | 1.2571          | 693640.8368 | 3.2079      |
|                             | $b_{\text{NPX}}$  | 1.0335          | 0.0843      | 0.0361      |
|                             | $n_{\text{NPX}}$  | 561968.7726     | 693640.8368 | 562123.0339 |
|                             | MPSD              | 5.8698          | 3.3928      | 0.2294      |
|                             | $R^2$             | 0.9924          | 0.9950      | 0.9883      |



**Table S5.** Fitting parameters of bicomponent equilibrium isotherms for NPX adsorption and effect of temperature.

| Isoterma                        | Parámetros        | Temperatura (K) |             |              |
|---------------------------------|-------------------|-----------------|-------------|--------------|
|                                 |                   | 298             | 313         | 328          |
| <b>Langmuir<br/>Extendida</b>   | $q_{\max}$        | 92.4868         | 126.2323    | 72.1714      |
|                                 | $b_{\text{NPX}}$  | 0.9691          | 16302.3670  | 4623653.7000 |
|                                 | $b_{\text{KTC}}$  | 0.0000          | 787.7512    | 4137.6072    |
|                                 | MPSD              | 2.4241          | 7.4815      | 2.0126       |
|                                 | $R^2$             | 0.9846          | 0.9521      | 0.9444       |
| <b>Freundlich<br/>Extendida</b> | $K_{\text{FNPX}}$ | 55.1439         | 64.3508     | 70.6575      |
|                                 | $n_{\text{NPX}}$  | 4.6414          | 6.6552      | 8.7649       |
|                                 | $X_{\text{NPX}}$  | 5.7040          | 2.7596      | 0.0000       |
|                                 | $Y_{\text{NPX}}$  | 0.0048          | 0.1867      | 0.0358       |
|                                 | $Z_{\text{NPX}}$  | 0.0100          | 0.0013      | 0.0000       |
|                                 | MPSD              | 0.1867          | 0.0146      | 0.0586       |
|                                 | $R^2$             | 0.9876          | 0.9618      | 0.9602       |
| <b>Sips Extendida</b>           | $q_{\text{mNPX}}$ | 80.4258         | 316921.3400 | 8440.6945    |
|                                 | $b_{\text{NPX}}$  | 2.3759          | 0.0001      | 0.0082       |
|                                 | $n_{\text{NPX}}$  | 0.5507          | 3.8521      | 8.7036       |
|                                 | $b_{\text{KTC}}$  | 0.0000          | 0.0020      | 0.0084       |
|                                 | $n_{\text{KTC}}$  | 3.7128          | 571304.2300 | 567073.1200  |
|                                 | MPSD              | 1.3876          | 1.9490      | 0.0588       |
|                                 | $R^2$             | 0.9832          | 0.9805      | 0.9601       |

**Table S6.** Fit parameters of physical-statistical bicomponent equilibrium models for KTC adsorption.

| Model          | Parameter        | Temperature (K) |            |            |
|----------------|------------------|-----------------|------------|------------|
|                |                  | 298             | 313        | 328        |
| SPM1           | n                | 0.5724          | 0.3973     | 0.3055     |
|                | N <sub>m</sub>   | 734.1320        | 16755.8340 | 1837.6107  |
|                | C <sub>1/2</sub> | 523.1203        | 12603243   | 58334.7820 |
|                | MPSD             | 10.7746         | 11.5883    | 1.2975     |
|                | R <sup>2</sup>   | 0.9920          | 0.9934     | 0.9886     |
| SPM2           | n <sub>1</sub>   | 0.5730          | 0.6888     | 0.3165     |
|                | Nm <sub>1</sub>  | 362.0886        | 185.7735   | 508.8459   |
|                | n <sub>2</sub>   | 0.5729          | 0.0055     | 0.3148     |
|                | Nm <sub>2</sub>  | 362.0886        | 1085.7349  | 508.8459   |
|                | C <sub>1</sub>   | 506.9288        | 106.7038   | 6126.5980  |
|                | C <sub>2</sub>   | 506.9288        | 6174.7615  | 6126.5980  |
|                | MPSD             | 13.1970         | 1.1892     | 1.6613     |
| R <sup>2</sup> | 0.9920           | 0.9946          | 0.9874     |            |
| SPM3           | n <sub>1</sub>   | 0.9995          | 0.9996     | 0.9997     |
|                | Nm <sub>1</sub>  | 382.3922        | 594.9329   | 576.5847   |
|                | C <sub>1</sub>   | 383.4175        | 596.8567   | 577.8935   |
|                | C <sub>2</sub>   | 522.6401        | 805.8019   | 786.8564   |
|                | MPSD             | 6.08E-05        | 0.0002     | 0.0001     |
| R <sup>2</sup> | 0.9499           | 0.9524          | 0.9242     |            |

**Table S7.** Fit parameters of physical-statistical bicomponent equilibrium models for NPX adsorption.

| Model | Parameter        | Temperature (K) |             |           |
|-------|------------------|-----------------|-------------|-----------|
|       |                  | 298             | 313         | 328       |
| SPM1  | n                | 1.8157          | 1.0558      | 0.1773    |
|       | N <sub>m</sub>   | 734.1320        | 101.8928    | 1706.6234 |
|       | C <sub>1/2</sub> | 523.1203        | 1.0792      | 490.2575  |
|       | MPSD             | 10.7746         | 0.3337      | 1.3677    |
|       | R <sup>2</sup>   | 0.9920          | 0.9610      | 0.9500    |
| SPM2  | n <sub>1</sub>   | 3.2438          | 0.4838      | 5.7373    |
|       | Nm <sub>1</sub>  | 9.2546          | 0.0100      | 5.7636    |
|       | n <sub>2</sub>   | 4.4042          | 1.0559      | 5.7373    |
|       | Nm <sub>2</sub>  | 12.2645         | 101.8653    | 5.7636    |
|       | C <sub>1</sub>   | 2.4081          | 0.3632      | 0.0101    |
|       | C <sub>2</sub>   | 0.4322          | 1.0791      | 0.0101    |
|       | MPSD             | 0.2336          | 0.4087      | 7.1031    |
|       | R <sup>2</sup>   | 0.9872          | 0.9610      | 0.9151    |
| SPM3  | n <sub>1</sub>   | 1.8157          | 1           | 0.1875    |
|       | Nm <sub>1</sub>  | 44.2924         | 118790      | 639.3025  |
|       | C <sub>1</sub>   | 0.6208          | 466029.0700 | 1.5853    |
|       | C <sub>2</sub>   | 2040.1167       | 14168420    | 63.0114   |
|       | MPSD             | 1.2979          | 209.4127    | 1.4836    |
|       | R <sup>2</sup>   | 0.9832          | 0.9274      | 0.9496    |

**Table S8.** Thermodynamic parameters from microscopic models for KTC and NPX adsorption.

| T (K)      | $\Delta E_1$ (KJ mol <sup>-1</sup> ) | $\Delta E_2$ (KJ mol <sup>-1</sup> ) |
|------------|--------------------------------------|--------------------------------------|
| <b>KTC</b> |                                      |                                      |
| 298        | 34.35                                | 16.07                                |
| 313        | 25.52                                | 13.64                                |
| 328        | 16.30                                | 10.03                                |
| <b>NPX</b> |                                      |                                      |
| 298        | 8.57                                 | 8.03                                 |
| 313        | 14.35                                | 10.42                                |
| 328        | 20.02                                | 7.54                                 |

**Table S9.** Combinations results of initial concentrations of KTC and NPX for a competing system

| $C_{0KTC}$ | $C_{0NPX}$ | Ce KTC (ppm) | Qe KTC (mg g <sup>-1</sup> ) | Rq KTC | $C_{0NPX}$ | $C_{0KTC}$ | Ce NPX (ppm) | Qe NPX (mg g <sup>-1</sup> ) | Rq NPX |
|------------|------------|--------------|------------------------------|--------|------------|------------|--------------|------------------------------|--------|
| 0.1        | 0          | 0            | 6.745                        | -      | 0.1        | 0          | 0            | 8.0425                       | -      |
| 0.3        | 0          | 0.794        | 19.744                       | -      | 0.3        | 0          | 0            | 18.96                        | -      |
| 0.5        | 0          | 3.837        | 31.60325                     | -      | 0.5        | 0          | 0.101        | 30.02725                     | -      |
| 0.7        | 0          | 9.623        | 45.09425                     | -      | 0.7        | 0          | 0.482        | 39.4345                      | -      |
| 0.9        | 0          | 22.53        | 55.95                        | -      | 0.9        | 0          | 5.312        | 54.7395                      | -      |
| 0.1        | 0.1        | 0            | 6.675                        | 0.989  | 0.1        | 0.1        | 0            | 6.135                        | 0.762  |
| 0.3        | 0.1        | 0            | 11.10975                     | 0.562  | 0.3        | 0.1        | 0            | 8.12                         | 0.428  |
| 0.5        | 0.1        | 6.378        | 29.2965                      | 0.927  | 0.5        | 0.1        | 0            | 8.12225                      | 0.270  |
| 0.7        | 0.1        | 17.785       | 40.22375                     | 0.891  | 0.7        | 0.1        | 0            | 8.1425                       | 0.206  |
| 0.9        | 0.1        | 29.235       | 52.71875                     | 0.942  | 0.9        | 0.1        | 0            | 8.65                         | 0.158  |
| 0.1        | 0.3        | 0.339        | 6.49275                      | 0.962  | 0.1        | 0.3        | 0            | 18.96                        | 2.357  |
| 0.3        | 0.3        | 1.487        | 19.158                       | 0.970  | 0.3        | 0.3        | 0            | 18.01                        | 0.949  |
| 0.5        | 0.3        | 12.714       | 27.6165                      | 0.873  | 0.5        | 0.3        | 0            | 18.9525                      | 0.631  |
| 0.7        | 0.3        | 31.091       | 36.93975                     | 0.819  | 0.7        | 0.3        | 0            | 18.775                       | 0.476  |
| 0.9        | 0.3        | 53.274       | 43.6665                      | 0.780  | 0.9        | 0.3        | 0            | 18.98                        | 0.346  |
| 0.1        | 0.5        | 0.781        | 6.63225                      | 0.983  | 0.1        | 0.5        | 0            | 29.745                       | 3.698  |
| 0.3        | 0.5        | 8.681        | 17.77225                     | 0.900  | 0.3        | 0.5        | 0            | 29.3875                      | 1.549  |
| 0.5        | 0.5        | 7.01         | 29.976                       | 0.948  | 0.5        | 0.5        | 0.474        | 31.214                       | 1.039  |
| 0.7        | 0.5        | 53.8         | 33.855                       | 0.750  | 0.7        | 0.5        | 0.818        | 30.148                       | 0.764  |
| 0.9        | 0.5        | 81.7         | 40.6575                      | 0.726  | 0.9        | 0.5        | 1.238        | 30.243                       | 0.552  |
| 0.1        | 0.7        | 9.51         | 4.3                          | 0.637  | 0.1        | 0.7        | 19.4         | 34.7675                      | 4.322  |
| 0.3        | 0.7        | 35.75        | 11.765                       | 0.595  | 0.3        | 0.7        | 48.05        | 27.8375                      | 1.468  |
| 0.5        | 0.7        | 53.96        | 18.38                        | 0.581  | 0.5        | 0.7        | 31.86        | 31.5925                      | 1.052  |
| 0.7        | 0.7        | 67.04        | 28.11                        | 0.623  | 0.7        | 0.7        | 20.054       | 34.544                       | 0.875  |
| 0.9        | 0.7        | 117.47       | 26.915                       | 0.481  | 0.9        | 0.7        | 19.67        | 34.695                       | 0.633  |
| 0.1        | 0.9        | 16.39        | 2.6275                       | 0.389  | 0.1        | 0.9        | 21.54        | 50.6825                      | 6.301  |
| 0.3        | 0.9        | 34.18        | 11.95                        | 0.605  | 0.3        | 0.9        | 43.02        | 45.3125                      | 2.389  |
| 0.5        | 0.9        | 67.8         | 17.8                         | 0.563  | 0.5        | 0.9        | 43.93        | 45.085                       | 1.501  |
| 0.7        | 0.9        | 115.54       | 18.1825                      | 0.403  | 0.7        | 0.9        | 75.73        | 37.135                       | 0.941  |
| 0.9        | 0.9        | 158.93       | 21.35                        | 0.3815 | 0.9        | 0.9        | 81.07        | 35.8                         | 0.654  |

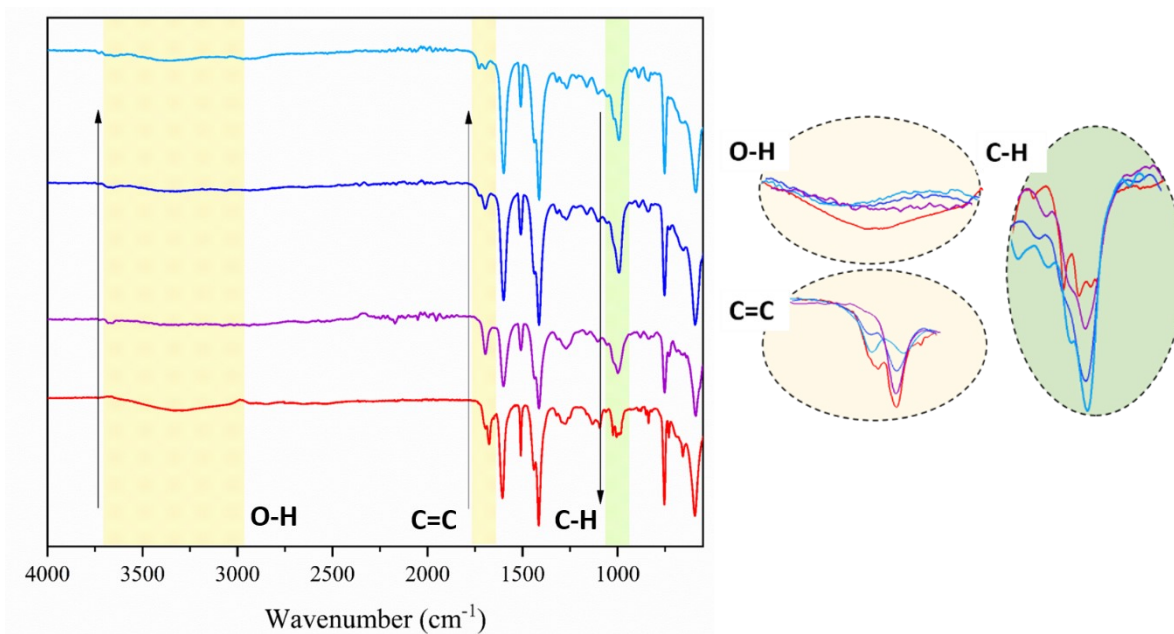

**Fig. S4.** Alteration of the main functional groups involved in the ADS process of KTC and NPX in saturated HC@MIL-53(Al) at different concentrations of both adsorbates.

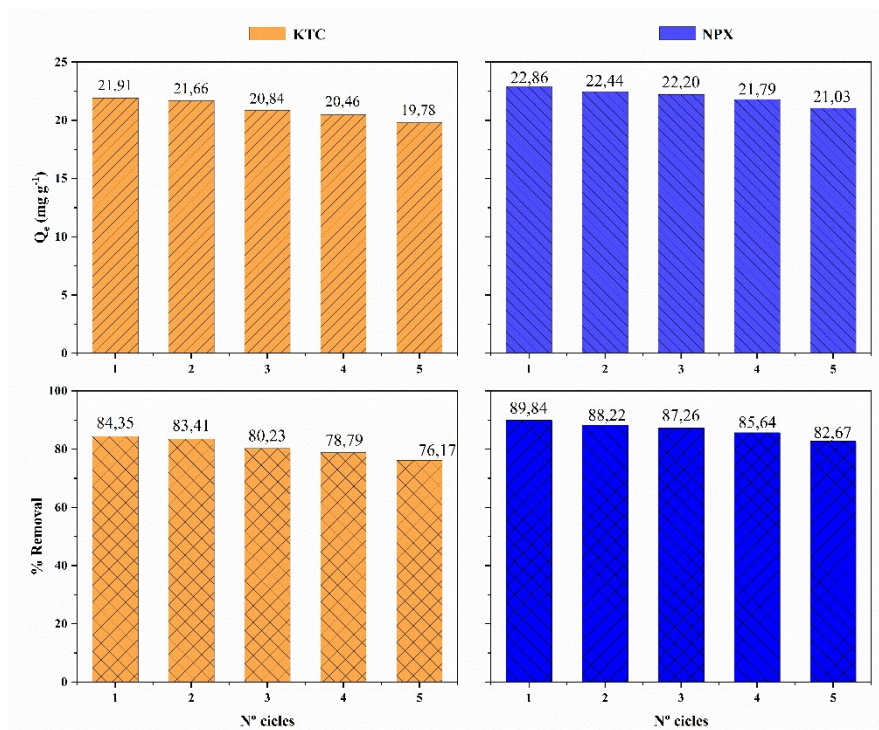

**Fig. S5.** ADS capacity ( $Q_e$ ) and removal (%R) of KTC (orange) and NPX (blue) as a function of the number of cycles.
